# Supplementary figures and images for: Common Chemical Plasticizer di(2-Ethhylhexyl) Phthalate Exposure Exacerbates Coxsackievirus B3 Infection
Source: Preprints.org preprint supplement (doi:10.20944/preprints202409.1523.v1), 2024-09-19

**A**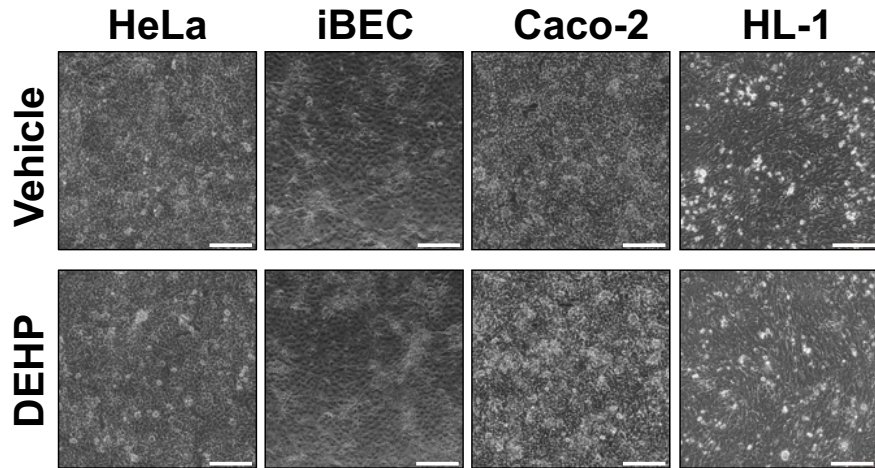**B**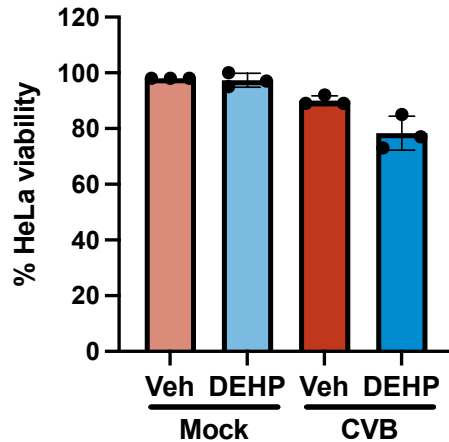

Supplement: Supplementary file 1 [file supplementary]

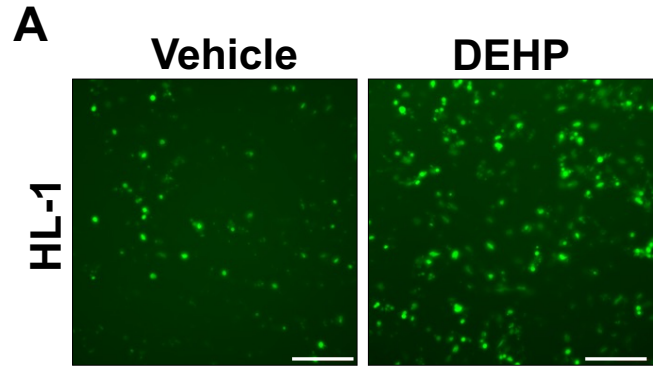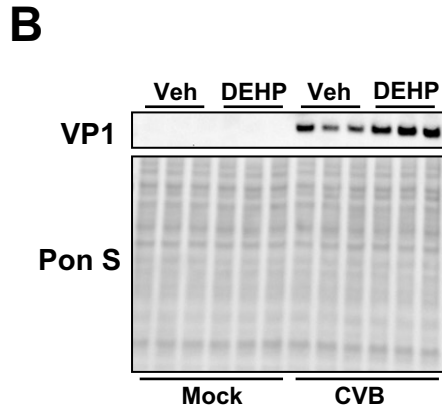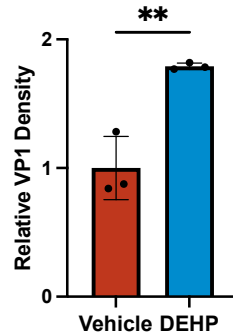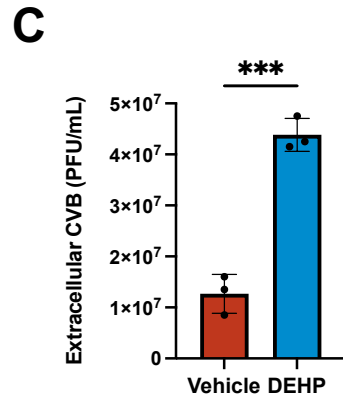

Supplement: Supplementary file 2 [file supplementary]
